# Supplementary material for: Improved human disease candidate gene prioritization using mouse phenotype
Source: Springer Nature journal article supplement (doi:10.1186/1471-2105-8-392), 2007-10-16
Supplement: Additional file 6 [file 1471-2105-8-392-s6.doc]

**Additional file 6:** Pair wise Pearson correlation test result of the *p-values* of all the features. The *p-value* of GO was created by taking the p-value of the average of GO:MF and GO:BP scores from the random sample. The result showed that the correlations of *p-values* from different features were low and so the independent requirement of Fisher’s meta-analysis was satisfied.
